# Supplementary material
Source: Springer Nature journal article supplement (https://www.springermedizin.de/resource/supplementary/12885_2012_5265_MOESM4_ESM.pdf/9465442)

**2 hr****10 hr****A**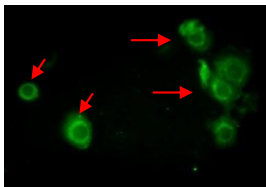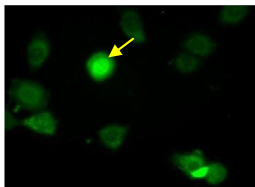**B**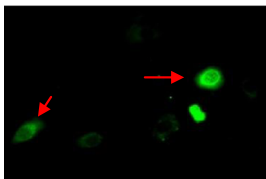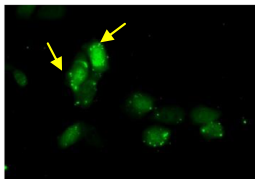**C**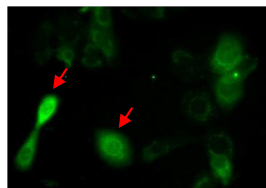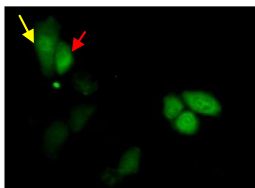**D**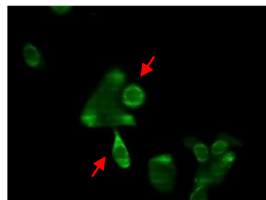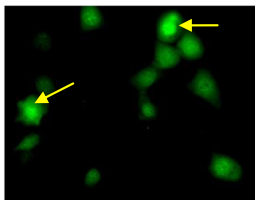**E**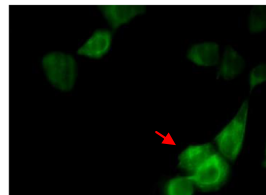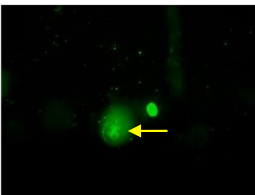**F**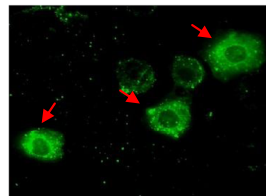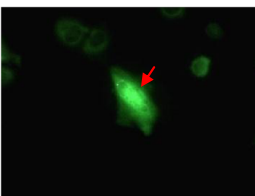**G**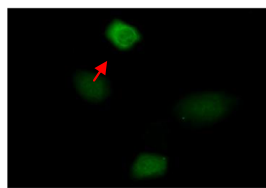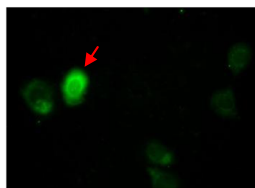

Supplement: MOESM4 [file 9465442]
